# Supplementary material for: Taxonomic Assignment-Based Genome Reconstruction from Apical Periodontal Metagenomes to Identify Antibiotic Resistance and Virulence Factors
Source: MDPI journal article supplement (doi:10.3390/life13010194), 2023-01-09
Supplement: s1 [file s1]

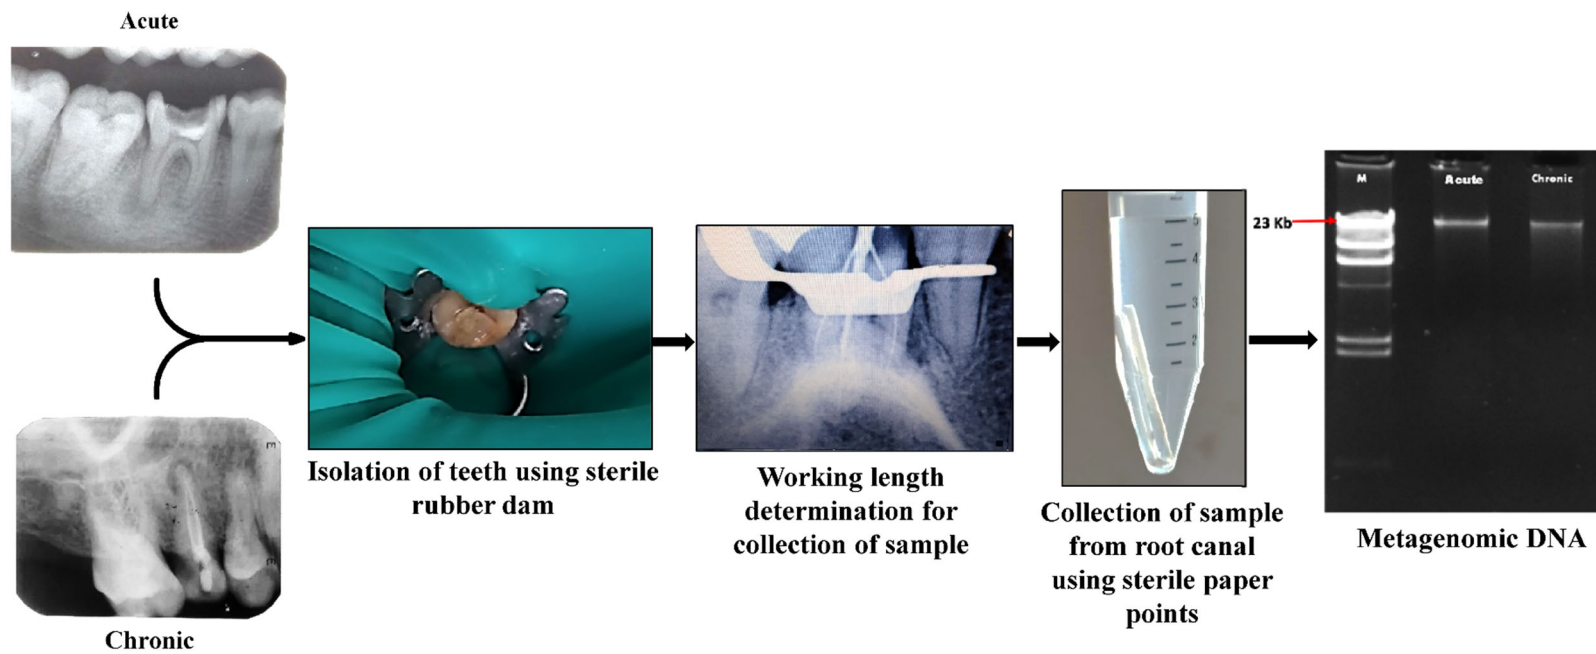

**Supplementary Figure S1:** Graphical workflow of the sample collection and DNA extraction process implemented in this study.
